# Supplementary material for: Reflexiones lingüísticas sobre el deporte
Source: Royal Society of Chemistry journal article supplement (doi:10.1039/c3cp52516c), 1995-01-01
Supplement: c3cp52516c.pdf [file c3cp52516c.pdf]

## Supplemental Data

# The relationship between enhanced enzyme activity and structural dynamics in ionic liquids: a combined computational and experimental study

Ho Shin Kim,<sup>1,2</sup> Sung Ho Ha,<sup>3</sup> Latsavongsakda Sethaphong,<sup>1</sup> Yoon-Mo Koo,<sup>\*,2</sup> and

Yaroslava G. Yingling<sup>\*,1</sup>

<sup>1</sup>Department of Materials Science and Engineering, North Carolina State University, 911  
Partners Way, Raleigh, NC 27695, USA

<sup>2</sup>Department of Biological Engineering, Inha University, Incheon 402-751, Korea

<sup>3</sup>Department of Chemical Engineering and Nano-Bio Technology, Hannam University, Daejeon  
305-811, Korea

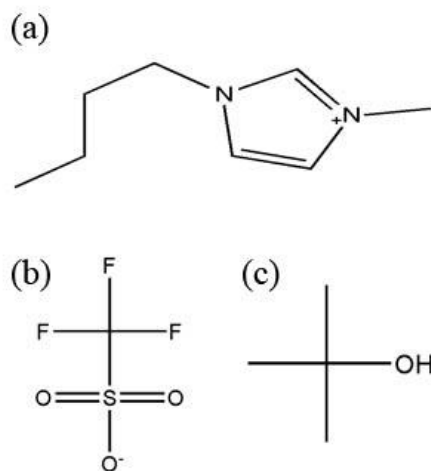

**Figure S1.** Chemical structure of solvents used in this study. (a) 1-Butyl-3-methylimidazolium ([Bmim]<sup>+</sup>), (b) Trifluoromethanesulfonate ([TfO]<sup>-</sup>) and (c) *tert*-butanol.

**Table S1.** Simulation set-up.

| Solvent              | Components           | Number of Ions / Molecules <sup>a</sup> | Volume of Simulation Box <sup>b</sup> (Å <sup>3</sup> ) |
|----------------------|----------------------|-----------------------------------------|---------------------------------------------------------|
| [Bmim][TfO]          | [Bmim] <sup>+</sup>  | 452                                     | 596,523                                                 |
|                      | [TfO] <sup>-</sup>   | 451                                     |                                                         |
| <i>tert</i> -butanol | Na <sup>+</sup>      | 1                                       | 636,935                                                 |
|                      | <i>tert</i> -butanol | 1,444                                   |                                                         |
| [Bmim][Cl]           | [Bmim] <sup>+</sup>  | 494                                     | 694,954                                                 |
|                      | Cl <sup>-</sup>      | 493                                     |                                                         |
| 0.3M NaCl solution   | Water                | 10,543                                  | 454,682                                                 |
|                      | Na <sup>+</sup>      | 82                                      |                                                         |
|                      | Cl <sup>-</sup>      | 81                                      |                                                         |

<sup>a</sup> One cation ([Bmim]<sup>+</sup>, or Na<sup>+</sup>) was additionally added into system to neutralize charge of system.

<sup>b</sup> Distance between any atom of enzyme and the edge of periodic box is at least 10 Å.

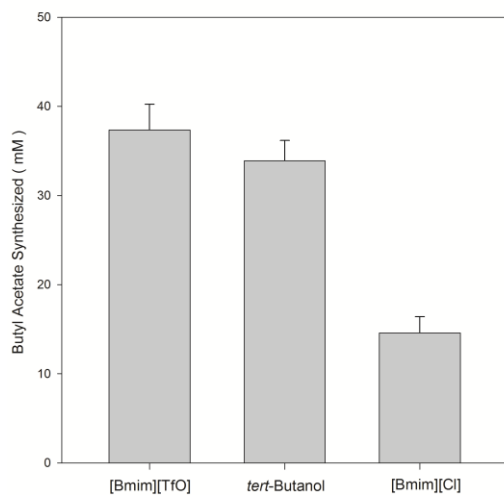

**Figure S2.** The production yield of butyl acetate after 12 h reaction in [Bmim][TfO], *tert*-butanol and [Bmim][Cl].

**Table S2.** The average of initial reaction rate of lipase-catalyzed trans-esterification of butyl alcohol with vinyl acetate in [Bmim][TfO], *tert*-butanol, [Bmim][Cl].

| Solvent              | Initial Reaction Rate (mM / hr) |
|----------------------|---------------------------------|
| [Bmim][TfO]          | 0.863                           |
| <i>tert</i> -butanol | 0.619                           |
| [Bmim][Cl]           | 0.153                           |

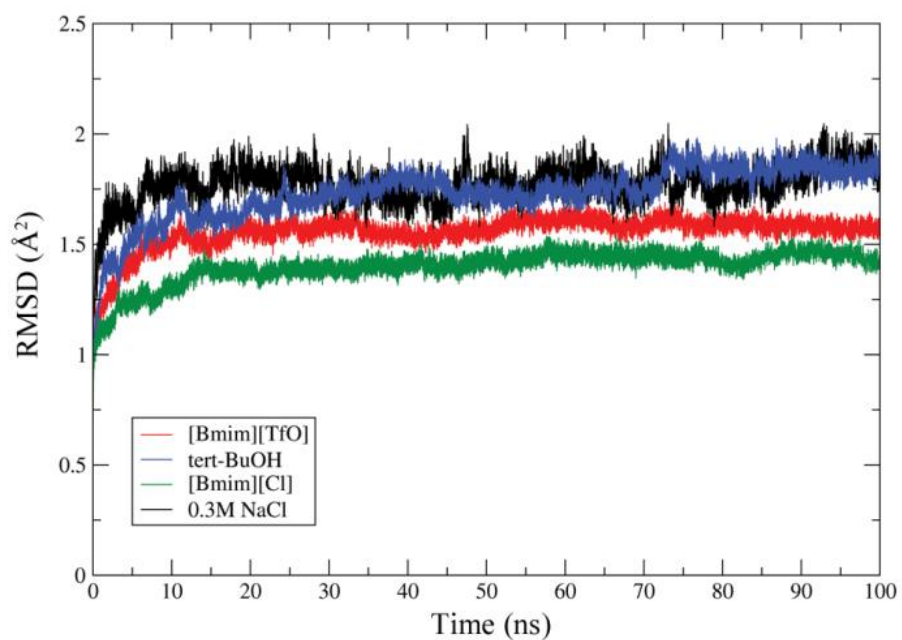

**Figure S3.** Root mean square deviation (RMSD) of CALB that was calculated for backbone atoms as a function of time during 100 ns in [Bmim][TfO] (Red), *tert*-butanol (Blue), [Bmim][Cl] (Green), and 0.3M NaCl solution (Black).

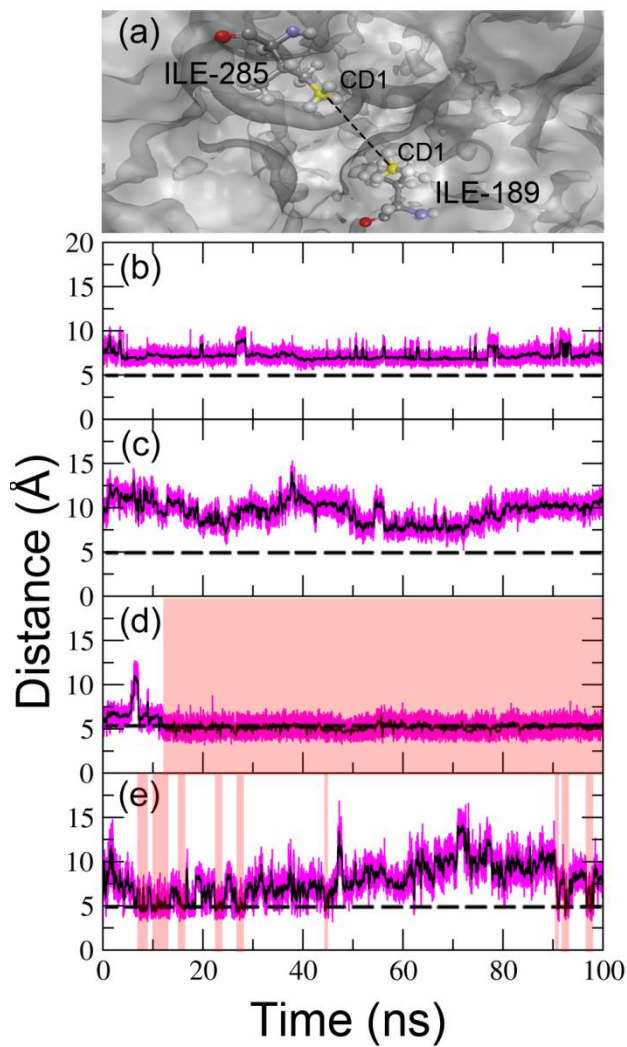

**Figure S4.** (a) Snapshot of CD1 atoms of ILE-189 and ILE-285, and (b-e) temporal profiles of the distance between CD1 atoms in ILE-189 and ILE-285 in (b) [Bmim][TfO], (c) *tert*-butanol, (d) [Bmim][Cl], and (e) 0.3M NaCl. Average profile is shown as black line. A black dotted line indicates the threshold distance for closed conformation and red shading indicates time periods when the distance is less than 5 Å.

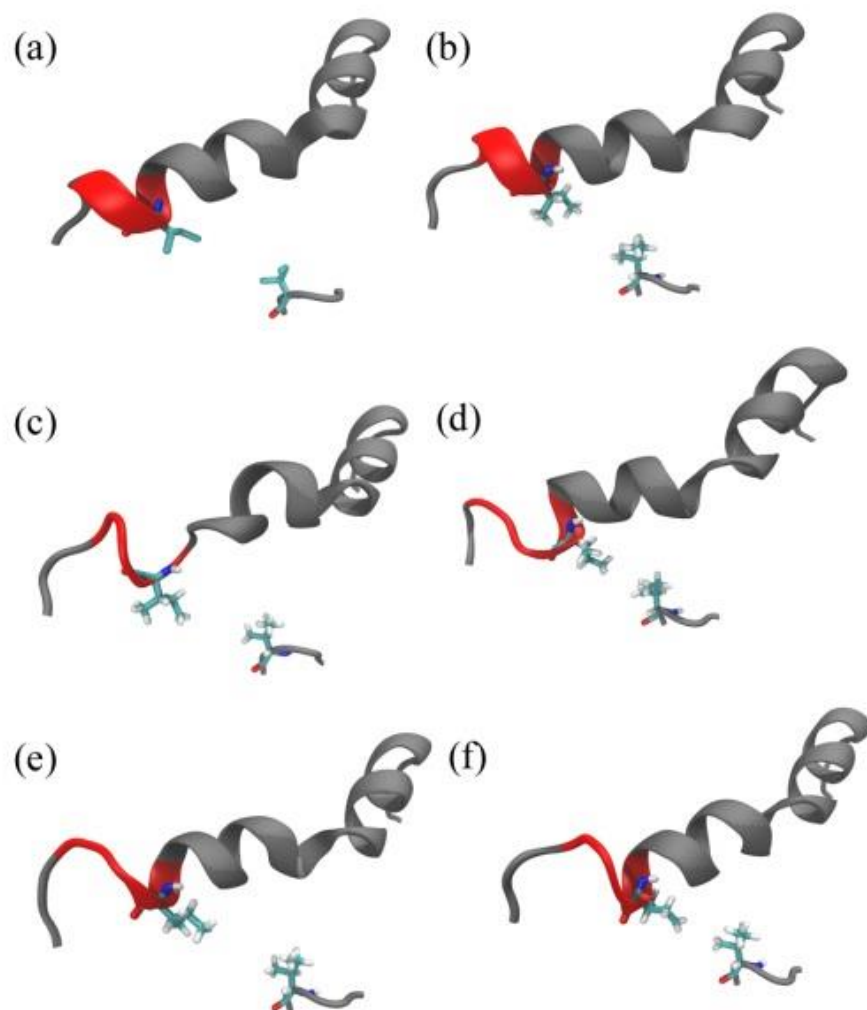

**Figure S5.** Conformational changes of the alpha-10 helix region in various solvents (a) initial X-ray crystal structure, (b) [Bmim][TfO], (c) *tert*-butanol, (d) [Bmim][Cl], (e) 0.3M NaCl (Open), (f) 0.3M NaCl (Closed). Region with significant conformational changes is shown in red. ILE-189 and ILE-285 are shown as stick molecular model.

**Table S3.** The number of anions that interact with CALB and the average non-bonded energy between CALB and one anion.

|             | Number of anions that interact with CALB <sup>a</sup> | Non-bonded energy between an anion and CALB <sup>b</sup> (kcal/mol) |
|-------------|-------------------------------------------------------|---------------------------------------------------------------------|
| [Bmim][TfO] | 55                                                    | -53.372                                                             |
| [Bmim][Cl]  | 37                                                    | -102.646                                                            |

<sup>a</sup> within 2.5 Å from surface of CALB

<sup>b</sup>Non-bonded energy = electrostatic energy + Van der Waals contribution
